# Supplementary material for: Integration Analysis of Hair Follicle Transcriptome and Proteome Reveals the Mechanisms Regulating Wool Fiber Diameter in Angora Rabbits
Source: MDPI journal article supplement (doi:10.3390/ijms25063260), 2024-03-13
Supplement: s1 [file s1]

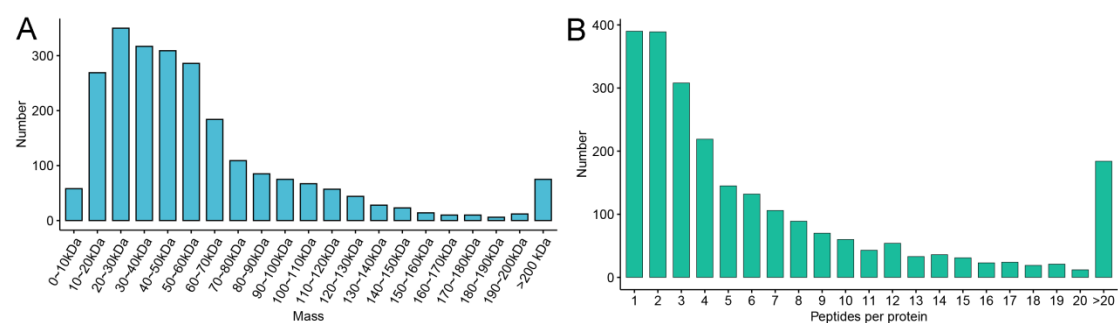

**Figure S1.** Identification of proteins in hair follicles of coarse and fine wool. **(A)** Molecular weight distribution of protein. Abscissa, molecular weight of the identified proteins; ordinate, number of the identified proteins. **(B)** Distribution of peptides in proteins.

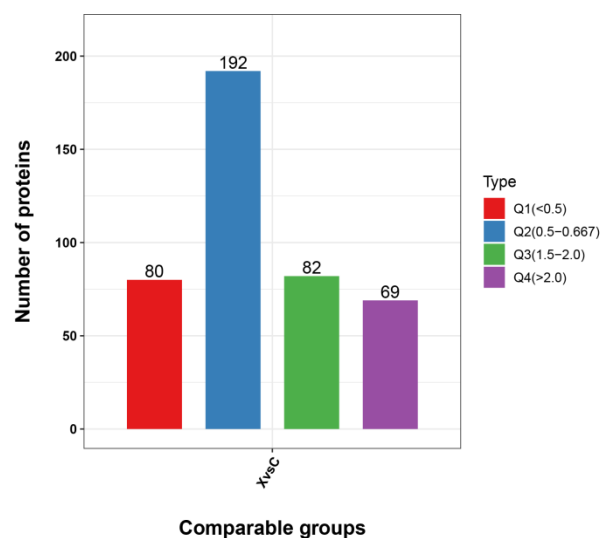

**Figure S2.** Proteins grouped according to the values of fold change.

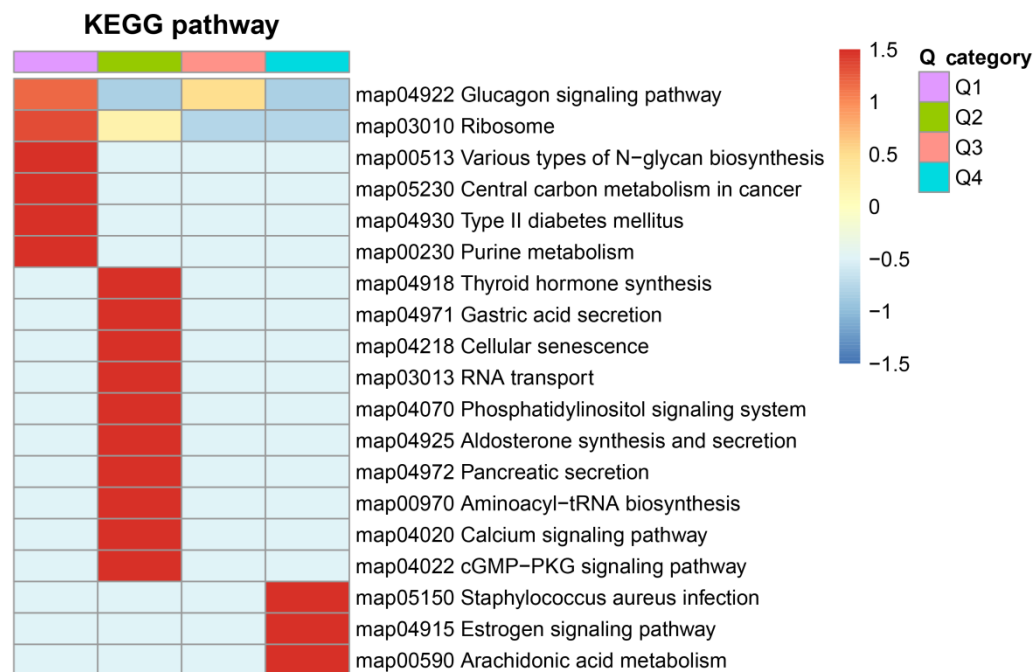

**Figure S3.** Heatmap analysis of differentially expressed proteins with different fold changes, and relevant Kyoto Encyclopedia of Genes and Genomes pathways in different Q groups are gathered together. Red, strong enrichment; blue, weak enrichment.  $Q1 < 0.5$ ,  $0.5 < Q2 < 0.667$ ,  $1.5 < Q3 < 2.0$ , and  $Q4 > 2.0$ .
