# Supplementary material for: Integration Analysis of Hair Follicle Transcriptome and Proteome Reveals the Mechanisms Regulating Wool Fiber Diameter in Angora Rabbits
Source: Int J Mol Sci. 2024 Mar 13;25(6):3260. doi: 10.3390/ijms25063260 (PMC10970426; doi:10.3390/ijms25063260)
Supplement: Supplementary file 1 [file ijms-25-03260-s001.zip]

Archive with 5 entries (5 files):
- Supplementary Figures.pdf
- Table S1.xls
- Table S2.xls
- Table S3.xls
- Table S4.xls
