# Supplementary material for: Integration Analysis of Hair Follicle Transcriptome and Proteome Reveals the Mechanisms Regulating Wool Fiber Diameter in Angora Rabbits
Source: Int J Mol Sci. 2024 Mar 13;25(6):3260. doi: 10.3390/ijms25063260 (PMC10970426; doi:10.3390/ijms25063260)
Supplement: Supplementary file 1 [file ijms-25-03260-s001.zip › Table S1.xls]

## Sheet: Sheet2
Table S1 33 differentially expressed proteins in hair follicles of coarse and fine wool.
Protein accession	Protein description	Gene name	X/C Ratio	X/C P value	Regulated Type	MW [kDa]	Coverage [%]	Peptides	Unique peptides	Unique peptides X1	Unique peptides X2	Unique peptides X3	Unique peptides X4	Unique peptides C1	Unique peptides C2	Unique peptides C3	Unique peptides C4	X1	X2	X3	X4	C1	C2	C3	C4
G1TEM1	Actinin alpha 2 OS=Oryctolagus cuniculus OX=9986 GN=ACTN2 PE=3 SV=2	ACTN2	0.401	3.35939e-08	Down	103.71	26.8	21	5	4	4	5	4	3	3	3	3	0.561681	0.567981	0.568046	0.590235	1.39403	1.40107	1.53014	1.38682
P68003	Voltage-dependent anion-selective channel protein 2 OS=Oryctolagus cuniculus OX=9986 GN=VDAC2 PE=2 SV=1	VDAC2	0.663	1.83453e-06	Down	31.58	54.1	11	11	10	11	11	11	9	9	10	10	0.831867	0.811036	0.789752	0.757837	1.20374	1.22275	1.21774	1.16528
A0A5F9CGE5	Protein transport protein SEC23 OS=Oryctolagus cuniculus OX=9986 GN=SEC23A PE=3 SV=1	SEC23A	0.596	3.7672e-06	Down	82.992	16.7	9	8	8	8	8	8	6	6	6	7	0.773646	0.745701	0.702771	0.764135	1.20149	1.23042	1.34346	1.23838
G1TEM7	Annexin OS=Oryctolagus cuniculus OX=9986 GN=ANXA3 PE=3 SV=2	ANXA3	0.443	4.37753e-11	Down	36.173	43.7	11	10	9	8	10	10	9	9	8	9	0.614095	0.625252	0.610301	0.606789	1.37125	1.39441	1.39362	1.38428
G1T438	Cysteine rich secretory protein 3 OS=Oryctolagus cuniculus OX=9986 GN=CRISP3 PE=3 SV=1	CRISP3	0.518	4.59693e-05	Down	27.966	14.8	3	3	2	3	3	3	2	3	3	3	0.5837	0.675357	0.764366	0.706393	1.39753	1.27118	1.23726	1.36421
G1SJY8	3-hydroxy-3-methylglutaryl coenzyme A synthase OS=Oryctolagus cuniculus OX=9986 GN=HMGCS1 PE=3 SV=2	HMGCS1	0.662	0.000161162	Down	59.869	37.3	14	14	12	12	12	11	11	12	12	11	0.75568	0.807426	0.769176	0.854103	1.10346	1.27078	1.3032	1.13617
G1T7L5	Inositol-phosphate phosphatase OS=Oryctolagus cuniculus OX=9986 GN=IMPA1 PE=3 SV=2	IMPA1	0.634	0.000404889	Down	48.543	8.7	3	3	2	2	2	3	2	2	2	2	0.778258	0.709325	0.776756	0.841184	1.29327	1.27379	1.03716	1.29026
G1T336	RNA helicase OS=Oryctolagus cuniculus OX=9986 GN=DDX3X PE=3 SV=2	DDX3X	0.505	1.19734e-09	Down	73.152	47.4	24	23	21	22	24	23	16	20	19	20	0.659276	0.687371	0.668942	0.667558	1.35086	1.30746	1.327	1.33153
G1TUB8	60S ribosomal protein L11 OS=Oryctolagus cuniculus OX=9986 GN=ELOA PE=1 SV=2	ELOA	0.592	1.49723e-06	Down	20.252	20.8	3	3	2	2	2	3	3	3	3	3	0.752807	0.767434	0.76864	0.684623	1.24479	1.26321	1.24433	1.27416
A0A5F9DEZ3	Endoplasmic reticulum oxidoreductase 1 alpha OS=Oryctolagus cuniculus OX=9986 GN=ERO1A PE=3 SV=1	ERO1A	0.262	5.0828e-05	Down	52.509	13.1	4	4	2	1	2	1	4	4	3	4	0.350883		0.344406		1.34638	1.38116	1.42788	1.14929
G1SZ91	Fatty acid binding protein 5 OS=Oryctolagus cuniculus OX=9986 GN=FABP5 PE=3 SV=3	FABP5	0.483	1.96118e-08	Down	11.358	88.1	11	11	11	10	9	10	8	8	8	8	0.625835	0.652914	0.668594	0.659521	1.38167	1.31402	1.32709	1.37036
A0A5F9CB42	Family with sequence similarity 98 member A OS=Oryctolagus cuniculus OX=9986 GN=FAM98A PE=3 SV=1	FAM98A	0.609	0.0120138	Down	34.393	8	2	2	2	2	2	1	2	2	2	2	0.521234	0.81989	0.854585		1.19766	1.25586	1.13792	1.21285
A0A5S8HZJ9	Gap junction protein OS=Oryctolagus cuniculus OX=9986 GN=GJA1 PE=3 SV=1	GJA1	0.506	3.5937e-09	Down	40.028	34.3	10	10	8	7	8	9	8	8	8	8	0.682829	0.673934	0.652118	0.680513	1.34205	1.29958	1.3231	1.34587
G1TM60	NADH:ubiquinone oxidoreductase subunit A9 OS=Oryctolagus cuniculus OX=9986 GN=NDUFA9 PE=4 SV=2	NDUFA9	0.548	1.31127e-06	Down	42.501	20.2	6	6	6	6	6	6	5	5	5	5	0.70401	0.667445	0.708404	0.751896	1.32594	1.2172	1.31418	1.31092
A0A5F9DNZ8	Nipsnap homolog 3A OS=Oryctolagus cuniculus OX=9986 GN=NIPSNAP3A PE=3 SV=1	NIPSNAP3A	0.463	3.53847e-08	Down	28.2	27.2	5	5	3	5	4	4	4	3	3	3	0.619936	0.625089	0.668594	0.618472	1.33257	1.36714	1.35841	1.40978
A0A5F9DMJ9	PDZ and LIM domain 5 OS=Oryctolagus cuniculus OX=9986 GN=PDLIM5 PE=4 SV=1	PDLIM5	0.381	7.42309e-07	Down	51.603	20.3	8	3	6	5	7	5	7	6	6	6	0.563282	0.52255	0.610914	0.509056	1.53046	1.39151	1.4533	1.41893
A0A5F9DF54	D-3-phosphoglycerate dehydrogenase OS=Oryctolagus cuniculus OX=9986 GN=PHGDH PE=3 SV=1	PHGDH	0.452	2.50354e-08	Down	56.462	24.4	9	9	8	8	9	8	9	8	8	9	0.63485	0.626505	0.603027	0.627729	1.40363	1.37787	1.30761	1.41878
G1SUH1	Keratin 72 OS=Oryctolagus cuniculus OX=9986 GN=KRT72 PE=3 SV=1	KRT72	2.708	4.71087e-10	Up	55.941	76.8	47	4	36	38	35	39	26	26	26	26	1.48963	1.44714	1.42908	1.47663	0.554567	0.537781	0.528679	0.536487
G1TDN8	Keratin 73 OS=Oryctolagus cuniculus OX=9986 GN=KRT73 PE=3 SV=1	KRT73	1.699	6.19365e-08	Up	58.431	62.6	39	19	20	21	23	22	19	20	19	17	1.27555	1.28601	1.22312	1.25092	0.7362	0.723433	0.738101	0.766669
G1SKE3	Keratin 77 OS=Oryctolagus cuniculus OX=9986 GN=KRT77 PE=3 SV=2	KRT77	3.751	1.05656e-08	Up	62.035	50.4	30	17	22	20	23	22	12	14	12	16	1.56985	1.56895	1.57445	1.60279	0.439551	0.421286	0.437522	0.385597
G1SDF4	Keratin 82 OS=Oryctolagus cuniculus OX=9986 GN=KRT82 PE=3 SV=3	KRT82	4.131	1.10187e-10	Up	53.864	71.1	41	29	32	33	33	32	26	26	26	26	1.61825	1.6198	1.62126	1.58167	0.405192	0.385982	0.378796	0.389048
G1T4P0	Keratin 32 OS=Oryctolagus cuniculus OX=9986 GN=KRT32 PE=3 SV=1	KRT32	2.967	5.87822e-11	Up	50.171	72	29	20	23	22	23	23	18	18	18	19	1.51188	1.51623	1.49829	1.45703	0.51091	0.497733	0.505697	0.502243
Q05017	Phospholipase B1, membrane-associated OS=Oryctolagus cuniculus OX=9986 GN=PLB1 PE=1 SV=1	PLB1	2.542	0.000826657	Up	161.34	14.8	14	14	13	13	12	14	6	5	4	4	1.28171	1.59709	1.0924	1.77007	0.6643	0.658755	0.500236	0.435443
G1SVK7	S100 calcium binding protein A3 OS=Oryctolagus cuniculus OX=9986 GN=S100A3 PE=4 SV=1	S100A3	1.513	9.53538e-06	Up	11.834	93.1	12	12	12	12	11	12	9	9	8	8	1.19315	1.27065	1.20335	1.14946	0.805739	0.821398	0.744936	0.811319
A0A5F9DSL3	Glycoprotein nmb OS=Oryctolagus cuniculus OX=9986 GN=GPNMB PE=3 SV=1	GPNMB	4.342	7.54259e-07	Up	51.505	5.6	2	2	2	2	2	2	2	2	2	2	1.60831	1.69733	1.36856	1.82816	0.411315	0.366599	0.365604	0.354118
G1U7R0	Serpin family B member 12 OS=Oryctolagus cuniculus OX=9986 GN=SERPINB12 PE=3 SV=1	SERPINB12	2.334	1.2642e-05	Up	48.003	29.2	9	9	9	9	9	9	4	5	4	4	1.33031	1.38667	1.37091	1.51276	0.640208	0.591306	0.661052	0.50678
G1SN11	Spectrin beta chain OS=Oryctolagus cuniculus OX=9986 GN=SPTBN1 PE=3 SV=3	SPTBN1	2.222	9.99316e-10	Up	250.35	46.9	75	64	74	75	74	74	48	49	50	49	1.34521	1.38888	1.40328	1.37986	0.627055	0.607812	0.616147	0.631754
G1TBC8	CTP synthase OS=Oryctolagus cuniculus OX=9986 GN=CTPS1 PE=3 SV=2	CTPS1	1.573	9.91047e-06	Up	60.641	49.1	19	17	19	17	19	19	14	12	15	13	1.16066	1.16796	1.29337	1.2683	0.792664	0.794176	0.735841	0.787028
G1TMI8	Arachidonate 12-lipoxygenase, 12R type OS=Oryctolagus cuniculus OX=9986 GN=ALOX12B PE=3 SV=2	ALOX12B	2.922	8.16145e-08	Up	72.273	23	8	8	7	8	7	7	4	6	4	5	1.48957	1.50439	1.50098	1.46518	0.509635	0.497845	0.473607	0.558799
G1SQ14	Arachidonate lipoxygenase 3 OS=Oryctolagus cuniculus OX=9986 GN=ALOXE3 PE=3 SV=2	ALOXE3	2.002	5.69011e-08	Up	80.628	15.6	7	6	6	6	5	5	3	3	3	3	1.3686	1.27845	1.31699	1.37106	0.677325	0.659077	0.64491	0.683588
G1TYM1	Aspartic peptidase retroviral like 1 OS=Oryctolagus cuniculus OX=9986 GN=ASPRV1 PE=4 SV=2	ASPRV1	2.054	6.65835e-07	Up	43.47	42.8	12	12	10	10	9	12	6	6	5	5	1.33191	1.36447	1.34949	1.3342	0.639547	0.641374	0.666945	0.672059
A0A5F9CU43	LIM domain 7 OS=Oryctolagus cuniculus OX=9986 GN=LMO7 PE=4 SV=1	LMO7	1.813	8.21126e-07	Up	167.11	31.4	30	30	27	26	27	25	15	16	16	16	1.21847	1.30142	1.34028	1.2956	0.74409	0.691675	0.681691	0.726766
G1T5V8	Lysophospholipase 2 OS=Oryctolagus cuniculus OX=9986 GN=LYPLA2 PE=3 SV=2	LYPLA2	5.256	1.34699e-07	Up	38.868	14.3	3	3	3	3	3	3	2	1	2	2	1.4746	1.55685	1.49661	1.59781	0.285011		0.275537	0.313582
Note: MW indicates protein molecular mass; X and C indicate the relative expression level of the normalized protein in hair follicle of fine and coarse wool, respectively; Peptides indicate the nnumber of peptide of each protein.
