# Supplementary material for: Integration Analysis of Hair Follicle Transcriptome and Proteome Reveals the Mechanisms Regulating Wool Fiber Diameter in Angora Rabbits
Source: Int J Mol Sci. 2024 Mar 13;25(6):3260. doi: 10.3390/ijms25063260 (PMC10970426; doi:10.3390/ijms25063260)
Supplement: Supplementary file 1 [file ijms-25-03260-s001.zip › Table S2.xls]

## Sheet: Sheet1
Table S2 up-regulated protein involved in biological processes at both transcriptomic and proteomic levels
GO Terms Level 1	GO Terms ID	Terms	Mapping	p value	Related Protein
Biological Process	GO:0030216	keratinocyte differentiation	5	9.70937e-08	KRT73 KRT77 KRT82 KRT72 KRT32
Biological Process	GO:0051122	hepoxilin biosynthetic process	2	3.93548e-06	ALOX12B ALOXE3
Biological Process	GO:0051121	hepoxilin metabolic process	2	3.93548e-06	ALOX12B ALOXE3
Biological Process	GO:0043651	linoleic acid metabolic process	2	0.000640498	ALOX12B ALOXE3
Biological Process	GO:0046513	ceramide biosynthetic process	2	0.000686821	ALOX12B ALOXE3
Biological Process	GO:0006636	unsaturated fatty acid biosynthetic process	2	0.000767533	ALOX12B ALOXE3
Biological Process	GO:0042759	long-chain fatty acid biosynthetic process	2	0.000942052	ALOX12B ALOXE3
Biological Process	GO:0072330	monocarboxylic acid biosynthetic process	2	0.0234629	ALOX12B ALOXE3
