# Supplementary material for: Integration Analysis of Hair Follicle Transcriptome and Proteome Reveals the Mechanisms Regulating Wool Fiber Diameter in Angora Rabbits
Source: Int J Mol Sci. 2024 Mar 13;25(6):3260. doi: 10.3390/ijms25063260 (PMC10970426; doi:10.3390/ijms25063260)
Supplement: Supplementary file 1 [file ijms-25-03260-s001.zip › Table S3.xls]

## Sheet: Sheet1
Table S3 Down-regulated protein involved in biological processes at both transcriptomic and proteomic levels
GO Terms Level	GO Terms ID	Terms	Mapping	p value	Related Protein
Biological Process	GO:0042255	ribosome assembly	2	0.00146212	DDX3X ELOA
Biological Process	GO:0034622	cellular protein-containing complex assembly	4	0.00956788	DDX3X ELOA NDUFA9 SEC23A
Biological Process	GO:0009749	response to glucose	2	0.0209663	GJA1 NDUFA9
Biological Process	GO:0022618	ribonucleoprotein complex assembly	2	0.021145	DDX3X ELOA
Biological Process	GO:0009746	response to hexose	2	0.0229669	GJA1 NDUFA9
Biological Process	GO:2001234	negative regulation of apoptotic signaling pathway	2	0.0360739	VDAC2 DDX3X
