# Supplementary material for: Integration Analysis of Hair Follicle Transcriptome and Proteome Reveals the Mechanisms Regulating Wool Fiber Diameter in Angora Rabbits
Source: Int J Mol Sci. 2024 Mar 13;25(6):3260. doi: 10.3390/ijms25063260 (PMC10970426; doi:10.3390/ijms25063260)
Supplement: Supplementary file 1 [file ijms-25-03260-s001.zip › Table S4.xls]

## Sheet: Sheet1
Table S4 Relative quantification of differential protein PRM
Protein accession	Gene name	Average_X	Average_C	X/C Ratio PRM	X/C P value	X/C Trend consistency
A0A5F9CGE5	SEC23A	0.770806	1.22919	0.627082	1.80166e-05	Yes
A0A5F9CU43	LMO7	1.38713	0.612867	2.26335	0.00149551	Yes
A0A5F9DF54	PHGDH	0.818559	1.18144	0.692847	0.00733935	Yes
A0A5F9DMJ9	PDLIM5	0.751108	1.24889	0.601419	5.95115e-07	Yes
A0A5S8HZJ9	GJA1	0.805337	1.19466	0.674112	0.000789923	Yes
G1SJY8	HMGCS1	0.742977	1.25702	0.591061	0.000366582	Yes
G1SKE3	KRT77	1.64743	0.352566	4.67269	2.79617e-08	Yes
G1SN11	SPTBN1	1.34405	0.655948	2.04902	1.61121e-07	Yes
G1SQ14	ALOXE3	1.40611	0.59389	2.36763	1.63924e-05	Yes
G1T336	DDX3X	0.609882	1.39012	0.438726	0.000107025	Yes
G1T4P0	KRT32	1.84287	0.157131	11.7282	1.34039e-07	Yes
G1TBC8	CTPS1	1.31068	0.689324	1.90139	5.22333e-05	Yes
G1TEM7	ANXA3	0.70128	1.29872	0.539978	5.31135e-05	Yes
G1TM60	NDUFA9	0.781588	1.21841	0.641481	0.00615968	Yes
G1TMI8	ALOX12B	1.49637	0.503629	2.97118	5.80202e-06	Yes
G1U7R0	SERPINB12	1.43187	0.568131	2.52031	8.80765e-08	Yes
P68003	VDAC2	0.706527	1.29347	0.546225	1.88406e-05	Yes
Q05017	PLB1	1.36232	0.637684	2.13635	2.34605e-06	Yes
